# Supplementary material for: Surface Display of porcine circovirus type 2 antigen protein cap on the spores of bacillus subtilis 168: An effective mucosal vaccine candidate
Source: PubMed Central journal article supplement (PMC9520567; doi:10.3389/fimmu.2022.1007202), 2022-09-15
Supplement: DataSheet_1.pdf [file DataSheet_1.pdf]

Supplementary materials for

**Surface Display of Porcine Circovirus Type 2 Antigen Protein *Cap* on the Spores of *Bacillus subtilis* 168: An effective mucosal vaccine candidate**

**Weijie Li<sup>1</sup>, Jianzhen Li<sup>1,2</sup>, Xixi Dai<sup>3</sup>, Minggang Liu<sup>1</sup>, Abdul Khaliq<sup>1</sup>, Zhenghua Wang<sup>2</sup>, Yan Zeng<sup>1</sup>, Dongmei Zhang<sup>1</sup>, Xueqin Ni<sup>1</sup>, Dong Zeng<sup>1</sup>, Bo Jing<sup>1</sup>, Kangcheng Pan<sup>1\*</sup>**

<sup>1</sup>Animal Microecology Institute, Department of Animal and Plant Quarantine, College of Veterinary Medicine, Sichuan Agricultural University, Chengdu 611100, China

<sup>2</sup>College of Animal Husbandry and Veterinary, Chengdu Agricultural College, Chengdu 611100, China;

<sup>3</sup>College of Animal Science and Technology, Chongqing Three Gorges Vocational College, Chongqing 404100, China

**\* Correspondence:**

Corresponding Author: +86 28 86290111; Fax: +86 28 82652669;

E-mail address: pankangcheng71@126.com

**The file includes:**

**Supplementary Tab. S1** The bacteria, virus strains, cell lines and plasmids used in this study.

**Supplementary Tab. S2** Representative strains of different *PCV2* genotypes used to construct phylogenetic tree.

**Supplementary Tab. S3** The primer sequences used for qPCR.

**Supplementary Tab. S4** tCap gene sequences and optimized sites.

**Supplementary Fig. S1** Cloning of truncated *Cap* gene and virus typing.

**Supplementary Fig. S2** Validation of recombinant integration plasmid pDG364-*cotB-tCap2*.

**Table S1** Strains, Cell, Plasmids and primers sequences.

| Plasmids, Strains, and Primers Sequences | Description                                                                                                                         | Source or Restriction Site                                                            |
|------------------------------------------|-------------------------------------------------------------------------------------------------------------------------------------|---------------------------------------------------------------------------------------|
| <b>Strains</b>                           |                                                                                                                                     |                                                                                       |
| <i>Porcine circovirus type 2</i>         | Spleen carrying the virus were collected from an infected pig at a pig farm in Sichuan in 2020, strain was named <i>PCV2</i> SC2020 | From Pig Farm Health Testing and Evaluation Center of Sichuan Agricultural University |
| <i>E. coli</i> DH5 $\alpha$ and BL21     | Type strain                                                                                                                         | TIANGEN Biotech (Beijing)                                                             |
| <i>B. subtilis</i> 168                   | GenBank Accession: AL009126.3                                                                                                       | Our lab                                                                               |
| <i>B. subtilis</i> RB                    | <i>B. subtilis</i> 168 <i>amyE::cotB-tCap</i>                                                                                       | This work                                                                             |
| <b>Cell</b>                              |                                                                                                                                     |                                                                                       |
| PK15 cell line                           | Type strain                                                                                                                         | Our lab                                                                               |
| <b>Plasmids</b>                          |                                                                                                                                     |                                                                                       |
| pUCm-T                                   | T-A Cloning vector                                                                                                                  | Sangon Biotech (Shanghai)                                                             |
| pET32a- <i>tCap</i>                      | prokaryotic expression vector                                                                                                       | This work                                                                             |
| pDG364                                   | <i>E. coli-B. subtilis</i> shuttle vector                                                                                           | Our lab                                                                               |
| pDG364- <i>cotB</i>                      | pDG364 derivative carrying <i>cotB</i> gene                                                                                         | Our previous work(17)                                                                 |
| pDG364 <i>cotB-tCap</i>                  | pDG364 derivative carrying the fusion <i>cotB-tCap</i> gene                                                                         | This work                                                                             |
| <b>Primer sequences</b>                  |                                                                                                                                     |                                                                                       |
| <i>tCap</i> -F1                          | 5'-CCGGGATCC*ATGAATGGCATCTTC-3'                                                                                                     | <i>Bam</i> H I                                                                        |
| <i>tCap</i> -R1                          | 5'-CGCGAATTCTTAGGGTTAAGTGGGGGGTC-3'                                                                                                 | <i>Eco</i> R I                                                                        |
| <i>tCap</i> -F2                          | 5'-CCGAAGCTTATGAATGGCATCTTC-3'                                                                                                      | <i>Hind</i> III                                                                       |
| <i>tCap</i> -R2                          | 5'-CGCGAATTCTTAGGGTTAAGTGGGGGGTC-3'                                                                                                 | <i>Eco</i> R I                                                                        |
| <i>cotB</i> -F                           | 5'-CGGGATCCACGGATTAGGCCGTTTGTCC-3'                                                                                                  | <i>Bam</i> H I                                                                        |
| <i>cotB</i> -R                           | 5'-GGGAAGCTTGGATGATTGATCATCTGAAG-3'                                                                                                 | <i>Hind</i> III                                                                       |
| <i>amyE</i> -F                           | 5'-CCAATGAGGTTAAGAGTATTCC-3'                                                                                                        | Null                                                                                  |
| <i>amyE</i> -R                           | 5'-CGAGAAGCTATCACCGCCAGC-3'                                                                                                         | Null                                                                                  |

**Table S2** Different strains of *PCV2* used to construct the phylogenetic tree

| Genotype     | Strains                                             | Accession number |
|--------------|-----------------------------------------------------|------------------|
| <i>PCV2a</i> | <i>Porcine circovirus 2</i> strain Canada           | AF055392.1       |
|              | <i>Porcine circovirus 2</i> strain CL               | HM038033.1       |
| <i>PCV2b</i> | <i>Porcine circovirus 2</i> strain LG               | HM038034.1       |
|              | <i>Porcine circovirus 2</i> strain TZ0601           | EU257511.1       |
|              | <i>Porcine circovirus 2</i> strain YJ,              | HM038032.1       |
|              | <i>Porcine circovirus 2</i> strain am5              | DQ856567.1       |
|              | <i>Porcine circovirus 2</i> strain 05-55004-7       | HQ713495.1       |
| <i>PCV2d</i> | <i>Porcine circovirus 2</i> from France             | AF055394.1       |
|              | <i>Porcine circovirus 2</i> strain BJ0401           | EF524515.1       |
|              | <i>Porcine circovirus type 2</i> strain TJ          | AY181946.1       |
|              | <i>Porcine circovirus 2</i> strain CH/HNZMD1/201406 | KX641112.1       |
|              | <i>Porcine circovirus 2</i> strain GDYX             | JX519293.1       |
|              | <i>Porcine circovirus 2</i> strain AH               | HM038030.1       |
| <i>PCV2c</i> | <i>Porcine circovirus 2</i> strain BDH              | HM038017.1       |
|              | <i>Porcine circovirus 2</i> strain CH/HBWH3/201310  | KX641085.1       |
|              | <i>Porcine circovirus 2</i> DK1990PMWSfree          | EU148505.1       |
|              | <i>Porcine circovirus 2</i> DK1987PMWSfree          | EU148504.1       |
|              | <i>Porcine circovirus 2</i> isolate DK1980PMWSfree  | EU148503.1       |

**Table S3** Primers' sequence of quantitative PCR.

| Gene    | Accession number | Primer sequences            |                          |
|---------|------------------|-----------------------------|--------------------------|
| β-actin | NM_007393.5      | F: GCTCTTTTCCAGCCTTCCTT     | R: GATGTCAACGTCACACTT    |
| IL-1β   | NM_008361.3      | F: ATGAAAGACGGCACCCAC       | R: GCTTGTGCTCTGCTTGTGAG  |
| IL-6    | NM_031168.1      | F: TGCAAGAGACTTCCATCCAGT    | R: GTGAAGTAGGGAAGGCCG    |
| IL-10   | NM_010548.2      | F: GGTTGCCAAGCCTTATCGGA     | R: ACCTGCTCCACTGCCTTGCT  |
| IFN-γ   | NM_008337.4      | F: TCAAGTGGCATAGATGTGGAAGAA | R: TGGCTCTGCAGGATTTTCATG |
| TNF-α   | NM_001278601.1   | F: ACGGCATGGATCTCAAAGAC     | R: AGATAGCAAATCGGCTGACG  |

\* The bacterial concentration was adjusted to  $2.0 \times 10^{10}$  CFU/ mL with normal saline. On day 1-3, 14-16, and 28-30, each mouse was given 0.1 mL intragastric administration every day for 3 consecutive days.

**Table S4** tCap gene sequences and optimized sites

| Gene           | Sequences                                                                     |     |
|----------------|-------------------------------------------------------------------------------|-----|
| tCap           | * <u>aagctt</u> <u>atg</u> aatggcatcttcaacaccgacctctcccgaccatcggttatactgtcaag | 60  |
|                | aaaaccacagtcagaacgccctcctggaatgtggacatgatgagatttaataatgat                     | 120 |
|                | tttcttccccaggaggggctcaaacacctcactgtgcccttgaatactacagaata                      | 180 |
|                | aggaaggttaaggttgaattctggccctgtccccaatcaccagggtgacaggggagtg                    | 240 |
|                | ggctccactgctgttattctagatgataactttgtaacaaaggccaatgccctaacctat                  | 300 |
|                | gaccctatgtaaactactcctcccgccataaccataaccagcccttctcctaccactcc                   | 360 |
|                | cggtactttaccccgaaacctgtccttgataggacaatcgattacttccaaccaataac                   | 420 |
|                | aaaagaaatcaactctggctgagactacaaactactggaaatgtagaccatgtaggcctc                  | 480 |
|                | ggcactgcggttcgaaaacagtatatacgaccaggactacaatatccgtataaccatgtat                 | 540 |
|                | gtacaattcagagaatttaattcttaagacccccacttaaacctaa <u>gaattc</u>                  | 594 |
| Optimized tCap | <u>aagctt</u> <u>atg</u> aatggcatcttcaacaccgacctctcccgaccatcggttatactgtcaag   | 60  |
|                | aaaaccacagtcagaacgccctcctggaatgtggacatgatgagatttaataatgat                     | 120 |
|                | tttcttccccaggaggggctcaaacacctcactgtgcccttgaatactacagaata                      | 180 |
|                | aggaaggttaaggttgaatttggccctgtccccaatcaccagggtgacaggggagtg                     | 240 |
|                | ggctccactgctgttattctagatgataactttgtaacaaaggccaatgccctaacctat                  | 300 |
|                | gaccctatgtaaactactcctcccgccataaccataaccagcccttctcctaccactcc                   | 360 |
|                | cggtactttaccccgaaacctgtccttgataggacaatcgattacttccaaccaataac                   | 420 |
|                | aaaagaaatcaactctggctgagactacaaactactggaaatgtagaccatgtaggcctc                  | 480 |
|                | ggcactgcggttcgaaaacagtatatacgaccaggactacaatatccgtataaccatgtat                 | 540 |
|                | gtacaattcagagaatttaattcttaagacccccacttaaacctaa <u>gaattc</u>                  | 594 |

\*aagctt is the Hind III restriction site, gaattc is the EcoR I restriction site; the yellow highlighted sequences are the optimized sites; the red highlighted sequences are the ATG promoter.

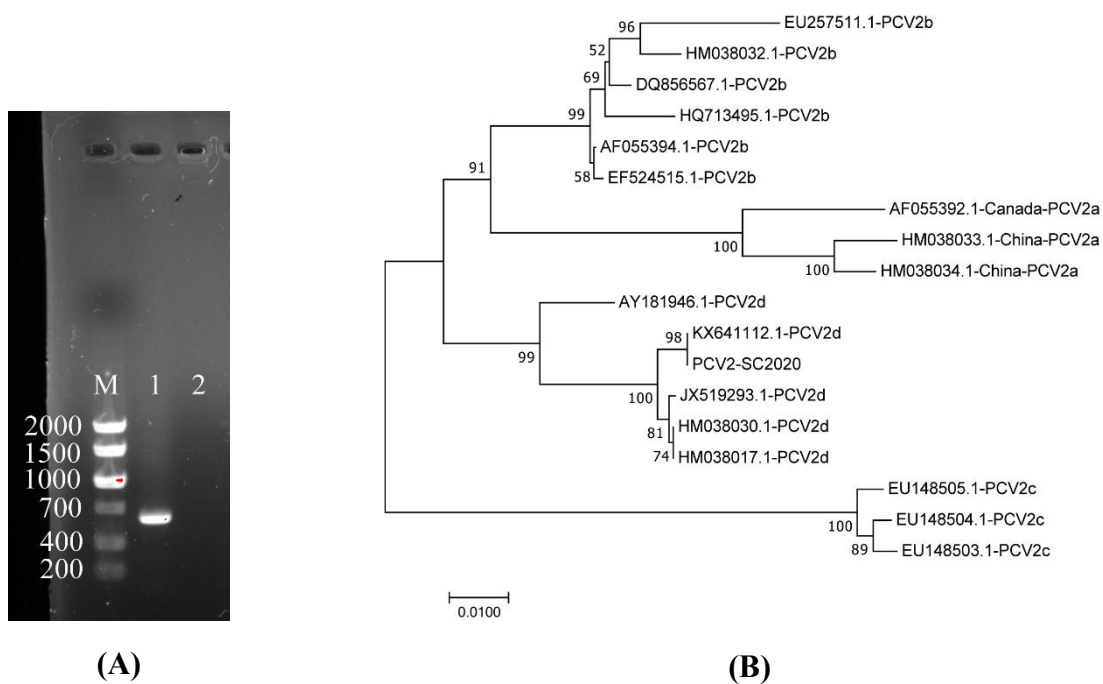

**Fig. S1** Cloning of truncated *Cap* gene and virus typing. (A) Agarose gel electrophoresis of target gene. M, 1 and 2 respectively represented DL2000F DNA Marker, PCR product of *tCap* gene and blank control. (B) Phylogenetic tree of *PCV2* SC2020 and other reference strains based on *tCap* nucleotide.

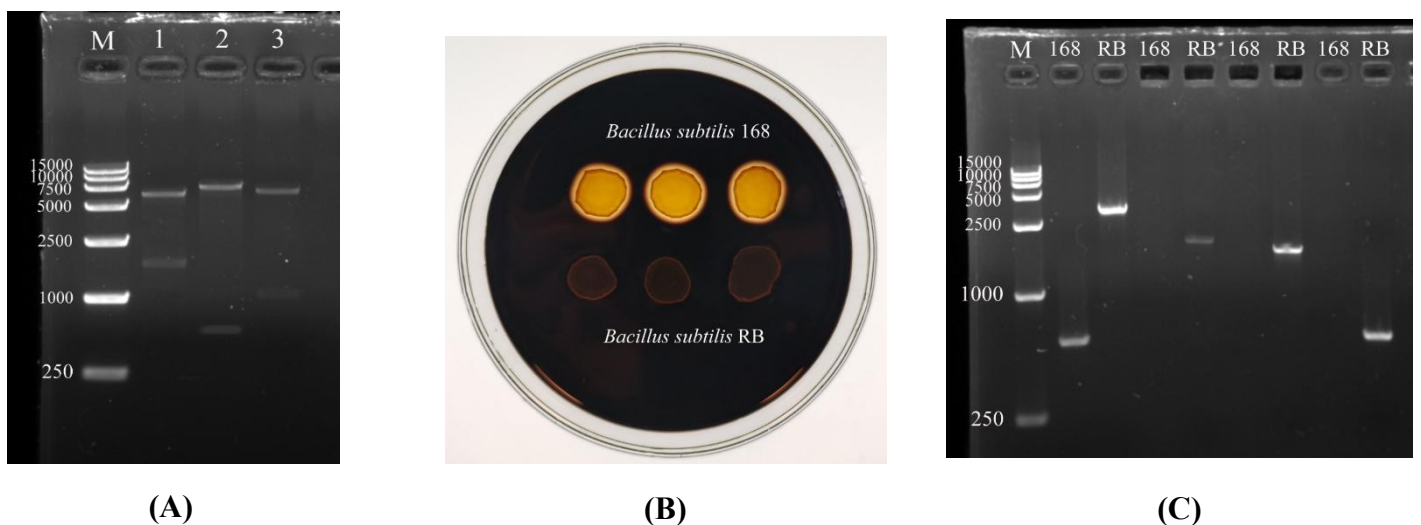

**Fig. S2** Validation of recombinant integration plasmid pDG364-*cotB-tCap2*. (A) Electrophoretic map of plasmid pDG364-*cotB-tCap2* after double digesting with *Bam*H I+*Eco*R I, *Hind* III+*Eco*R I, and *Bam*H I+*Hind* III, respectively. M, protein marker (250-15000bp); Line 1, *Bam*H I+*Eco*R I; Line 2, *Hind* III+ *Eco*R I; Line 3, *Bam*H I+*Hind* III. (B) *B. subtilis* 168 and *B. subtilis* RB were grown on LB medium containing 1.5% starch for 24 hours and then stained with iodine. (C) Agar gel electrophoresis of *B. subtilis* 168 and *B. subtilis* RB genomes amplified with primers *amyE*-F/ *amyE*-R, *amyE*-F/*tCap2*-R, *cotB*-F/*tCap2*-R and *tCap2*-F/*tCap2*-R.
